# Supplementary material for: Stimulus-Responsive, Gelatin-Containing Supramolecular Nanofibers as Switchable 3D Microenvironments for Cells
Source: MDPI journal article supplement (doi:10.3390/polym14204407), 2022-10-19
Supplement: s1 [file s1]

**Supplementary Materials to**

**“Stimulus Responsive, Gelatin-Containing Supramolecular Nanofibers as Switchable 3D**

**Microenvironments for Cells”**

*Kentaro Hayashi, Mami Matsuda, Masaki Nakahata, Yoshinori Takashima,  
Motomu Tanaka*

Supplementary Material S1. 2D ROESY NMR spectrum of amino- $\beta$ CD/amino-Ad

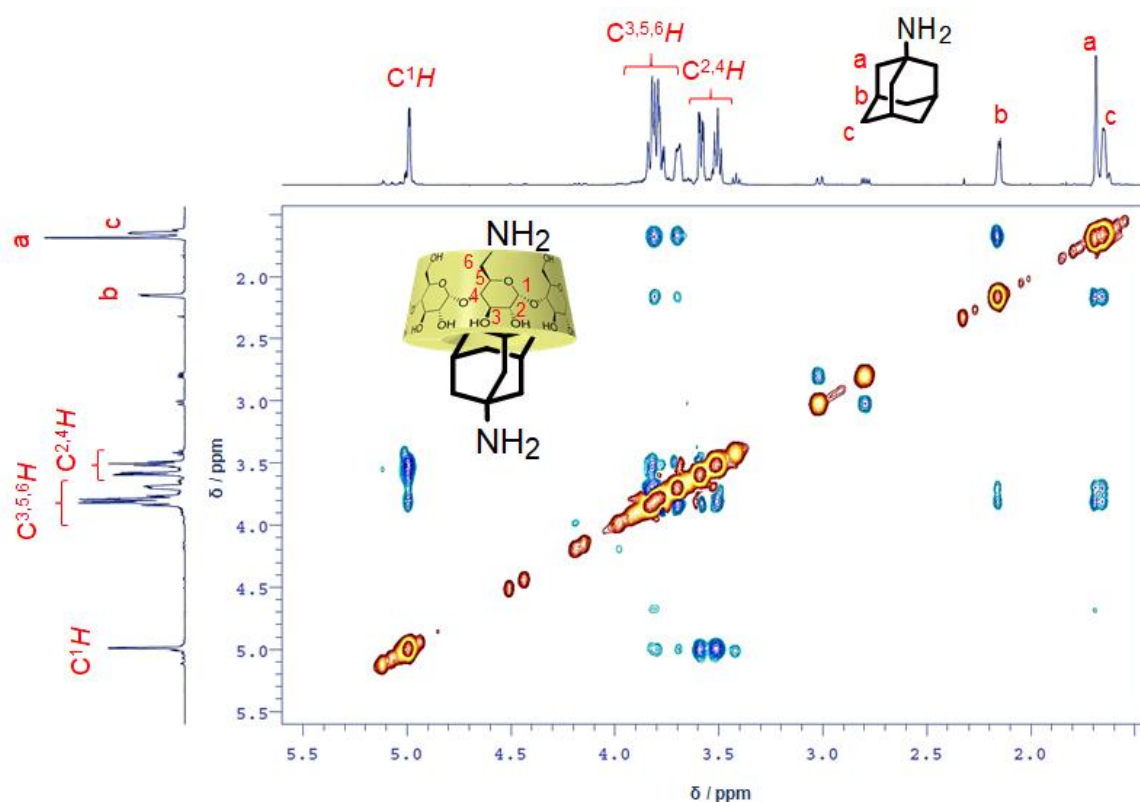

**Figure S1.**  $^1\text{H}$ - $^1\text{H}$  2D rotating-frame nuclear Overhauser effect spectroscopy (ROESY) NMR spectrum of Amino- $\beta$ CD/Amino-Ad complex in  $\text{D}_2\text{O}$  acquired on a 600 MHz JEOL ECA-600 NMR spectrometer at 25  $^\circ\text{C}$ . Chemical shifts were referenced to HOD as a standard ( $\delta = 4.7$  ppm). The peak of HOD was eliminated.

**Supplementary Material S2. ATR-FTIR of materials related to gelatin- $\beta$ CD-Ad (Method 1).**

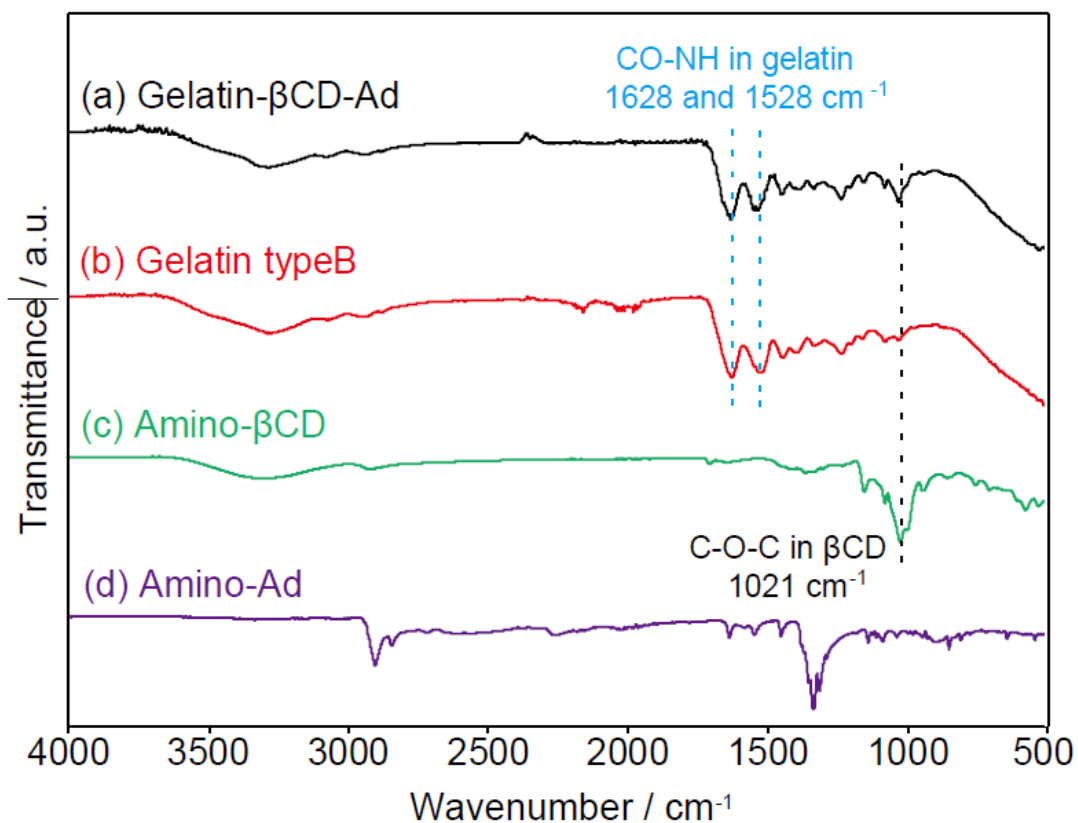

**Figure S2.** ATR-FTIR spectra of (a) gelatin- $\beta$ CD-Ad, (b) gelatin type B, (c) amino- $\beta$ CD, and (d) amino-Ad through diamond crystal acquired on a JASCO FT/IR 6100 spectrometer.

**Supplementary Material S3. ATR-FTIR of materials related to gelatin- $\beta$ CD-gelatin and Ad-gelatin (Method 2).**

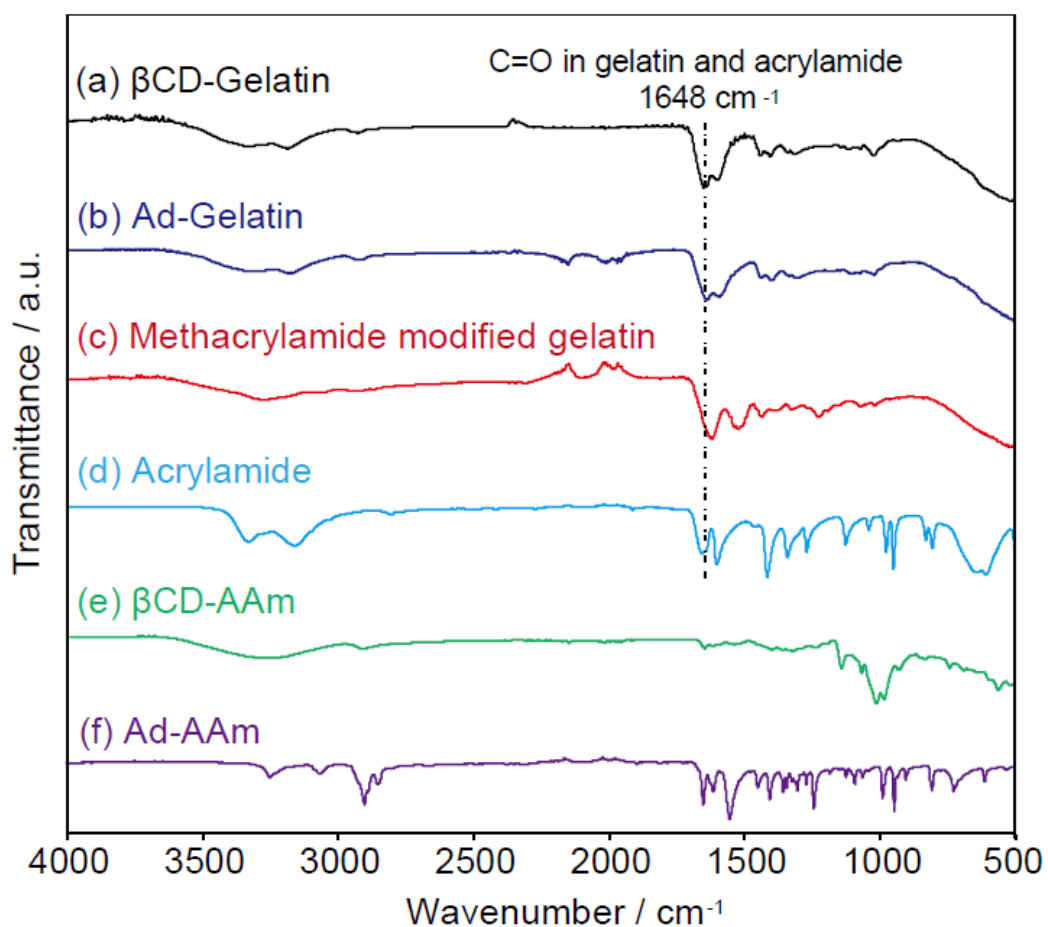

**Figure S3.** ATR-FTIR spectra of (a)  $\beta$ CD-gelatin, (b) Ad-gelatin, (c) methacrylamide modified gelatin, (d) acrylamide, (e)  $\beta$ CD-AAm, and (f) Ad-AAm through diamond crystal acquired on a JASCO FT/IR 6100 spectrometer.

**Supplementary Material S4. Optical microscopy images of  $\beta$ CD-gelatin/  
Ad-gelatin fibers (Method 2)**

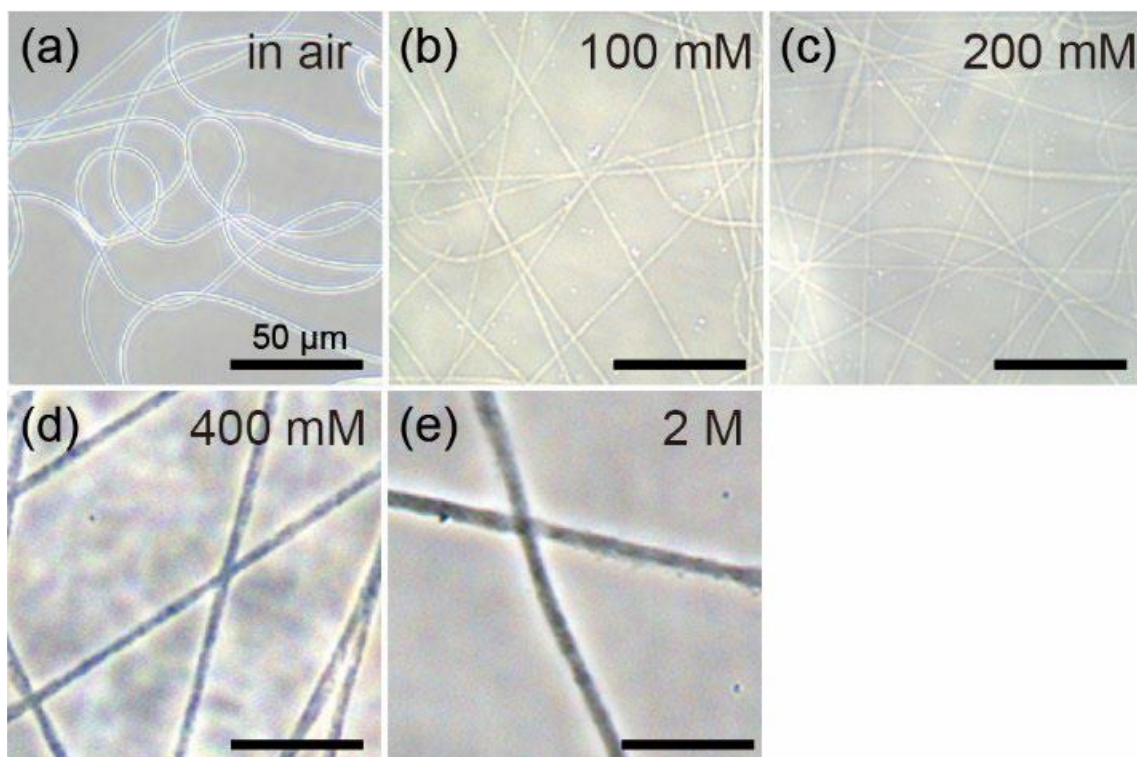

**Figure S4.** Optical microscopy images of  $\beta$ CD-gelatin/Ad-gelatin nanofibers **(a)** before chemical cross-linking (in air) and after cross-linking with **(b)** 100 mM, **(c)** 200 mM, **(d)** 400 mM and **(e)** 2 M NHS/EDC (in PBS).

**Supplementary Material S5. Compositions of synthesized polymers.**

**Table S1 a.** Composition of gelatin- $\beta$ CD-Ad.

|                            |                   |
|----------------------------|-------------------|
| Gelatin                    | 2.0 g             |
| Carboxyl units in gelatin  | 2.2 mmol          |
| Amino- $\beta$ CD/amino-Ad | 2.8 g / 2.2 mmol  |
| EDC                        | 1.5 g / 8.0 mmol  |
| NHS                        | 0.92 g / 8.0 mmol |
| MES buffer                 | 40 mL             |

**Table S1 b.** Composition of  $\beta$ CD-gelatin.

|                                 |                      |
|---------------------------------|----------------------|
| AAM                             | 0.7 g / 9.9 mmol     |
| Methacrylamide-modified gelatin | 25 mg                |
| Methacryloyl units              | 3.3 $\mu$ mol        |
| $\beta$ CD-AAM                  | 0.12 g / 0.1 mmol    |
| LAP                             | 1.5 mg / 5 $\mu$ mol |
| DMSO                            | 5 mL                 |

**Table S1 c.** Composition of Ad-gelatin.

|                                 |                      |
|---------------------------------|----------------------|
| AAM                             | 0.7 g / 9.9 mmol     |
| Methacrylamide-modified gelatin | 25 mg                |
| Methacryloyl units              | 3.3 $\mu$ mol        |
| Ad-AAM                          | 21 mg / 0.1 mmol     |
| LAP                             | 1.5 mg / 5 $\mu$ mol |
| DMSO                            | 5 mL                 |
